# Supplementary material for: Proteomics Investigation of Diverse Serological Patterns in COVID-19
Source: bioRxiv or medRxiv preprint supplement (doi:10.1101/2022.08.21.22278967), 2022-08-22
Supplement: Supplementary file [file media-1.pdf]

## Supplementary Data

### Proteomics Landscape of Diverse Serological Patterns in COVID-19

Xiao Liang<sup>1,2</sup>, Rui Sun<sup>2</sup>, Jing Wang<sup>3</sup>, Kai Zhou<sup>3</sup>, Jun Li<sup>3</sup>, Shiyong Chen<sup>3</sup>, Mengge Lyu<sup>2</sup>, Sainan Li<sup>2</sup>, Zhangzhi Xue<sup>2</sup>, Yingqiu Shi<sup>2</sup>, Yuting Xie<sup>2</sup>, Qiushi Zhang<sup>4</sup>, Xiao Yi<sup>4</sup>, Juan Pan<sup>3</sup>, Donglian Wang<sup>3</sup>, Jiaqin Xu<sup>3</sup>, Hongguo Zhu<sup>3</sup>, Guangjun Zhu<sup>3</sup>, Jiansheng Zhu<sup>3</sup>, Yi Zhu<sup>2</sup>, Yufen Zheng<sup>3\*</sup>, Bo Shen<sup>3\*</sup>, Tiannan Guo<sup>1,2\*</sup>

<sup>1</sup> Fudan University, Shanghai, China;

<sup>2</sup> Center for Infectious Disease Research, Zhejiang Provincial Laboratory of Life Sciences and Biomedicine, Key Laboratory of Structural Biology of Zhejiang Province, Westlake University, Hangzhou, Zhejiang, China;

<sup>3</sup> Taizhou Hospital of Zhejiang Province affiliated to Wenzhou Medical University, Linhai, Zhejiang, China;

<sup>4</sup> Westlake Omics (Hangzhou) Biotechnology Co., Ltd., Hangzhou, Zhejiang, China.

\* Corresponding authors

Correspondence: Y.Z ([zhengyf@enzemed.com](mailto:zhengyf@enzemed.com)), B.S ([shenb@enzemed.com](mailto:shenb@enzemed.com)), and T.G ([guotiannan@westlake.edu.cn](mailto:guotiannan@westlake.edu.cn))

## Table of contents

Supplementary figure legends

Figure S1

Figure S2

Supplementary materials provided as separate files

## **Supplementary figure legends**

**Figure S1 Serology characteristics in COVID-19 patients.** A) Plateau expression of IgM and IgG labeled with different groups. B) Summary of patient and serology test number from different groups. C-D) Scatterplots of NAbs expression titers and their correlations with IgG and IgM expression titers, respectively.

**Figure S2 Proteomic experiment for the serum samples from the characteristic patients.** A) Temporal IgM and IgG expression of the 16 characteristic patients. B) Proteomic experimental workflow for serum sample preparation. C) Coefficient of variation for the pooled samples in eight batches. D) Summary of DEPs count from weeks 1-10.

**Figure S1**

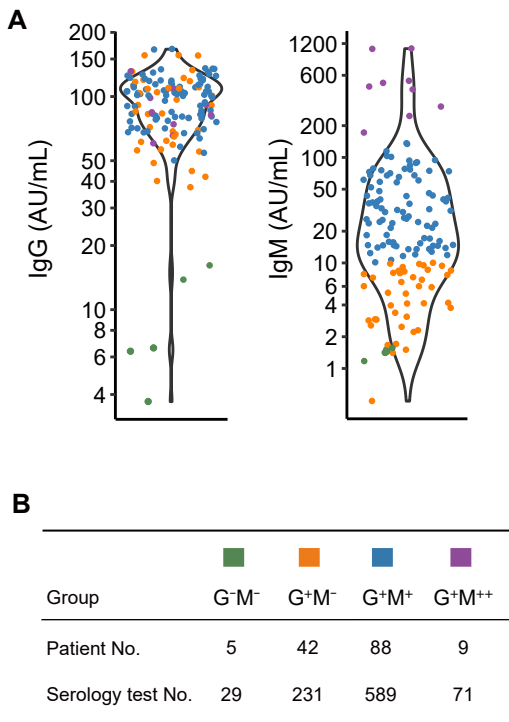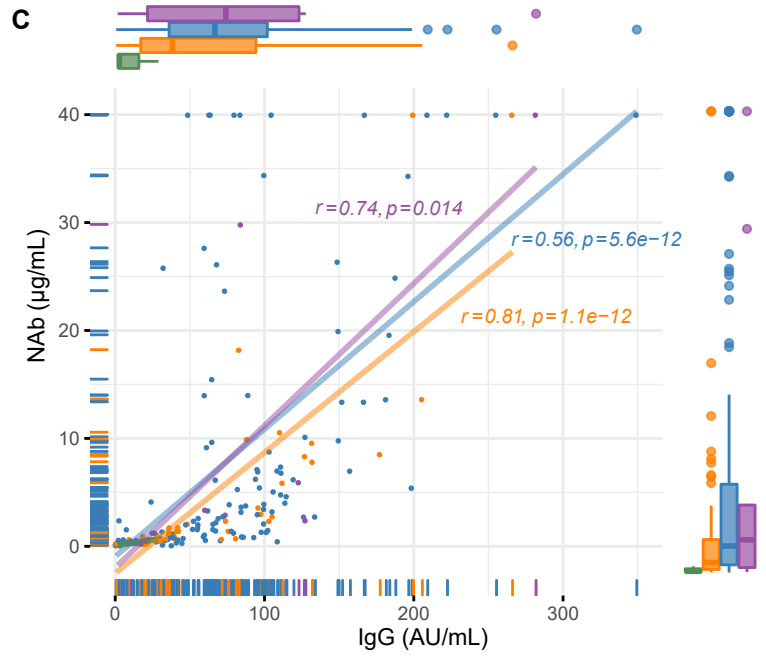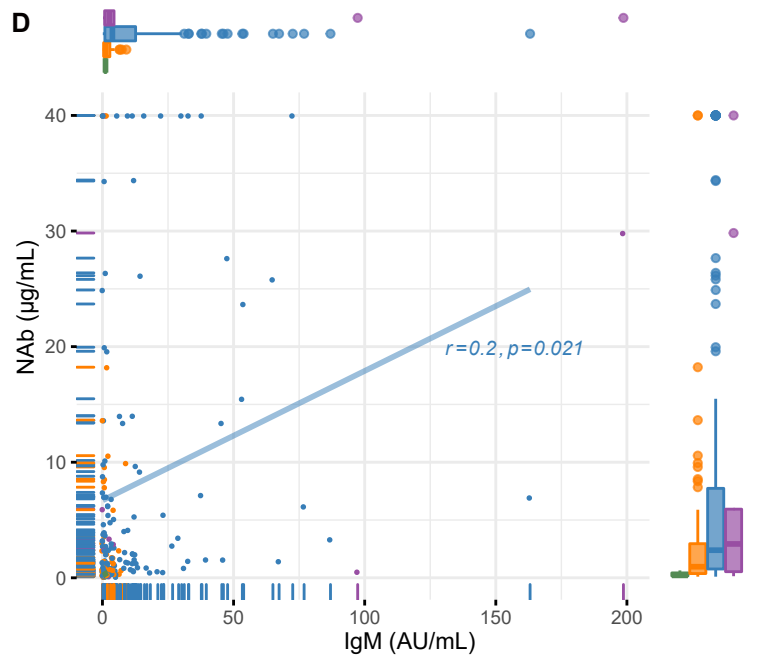

**Figure S2**

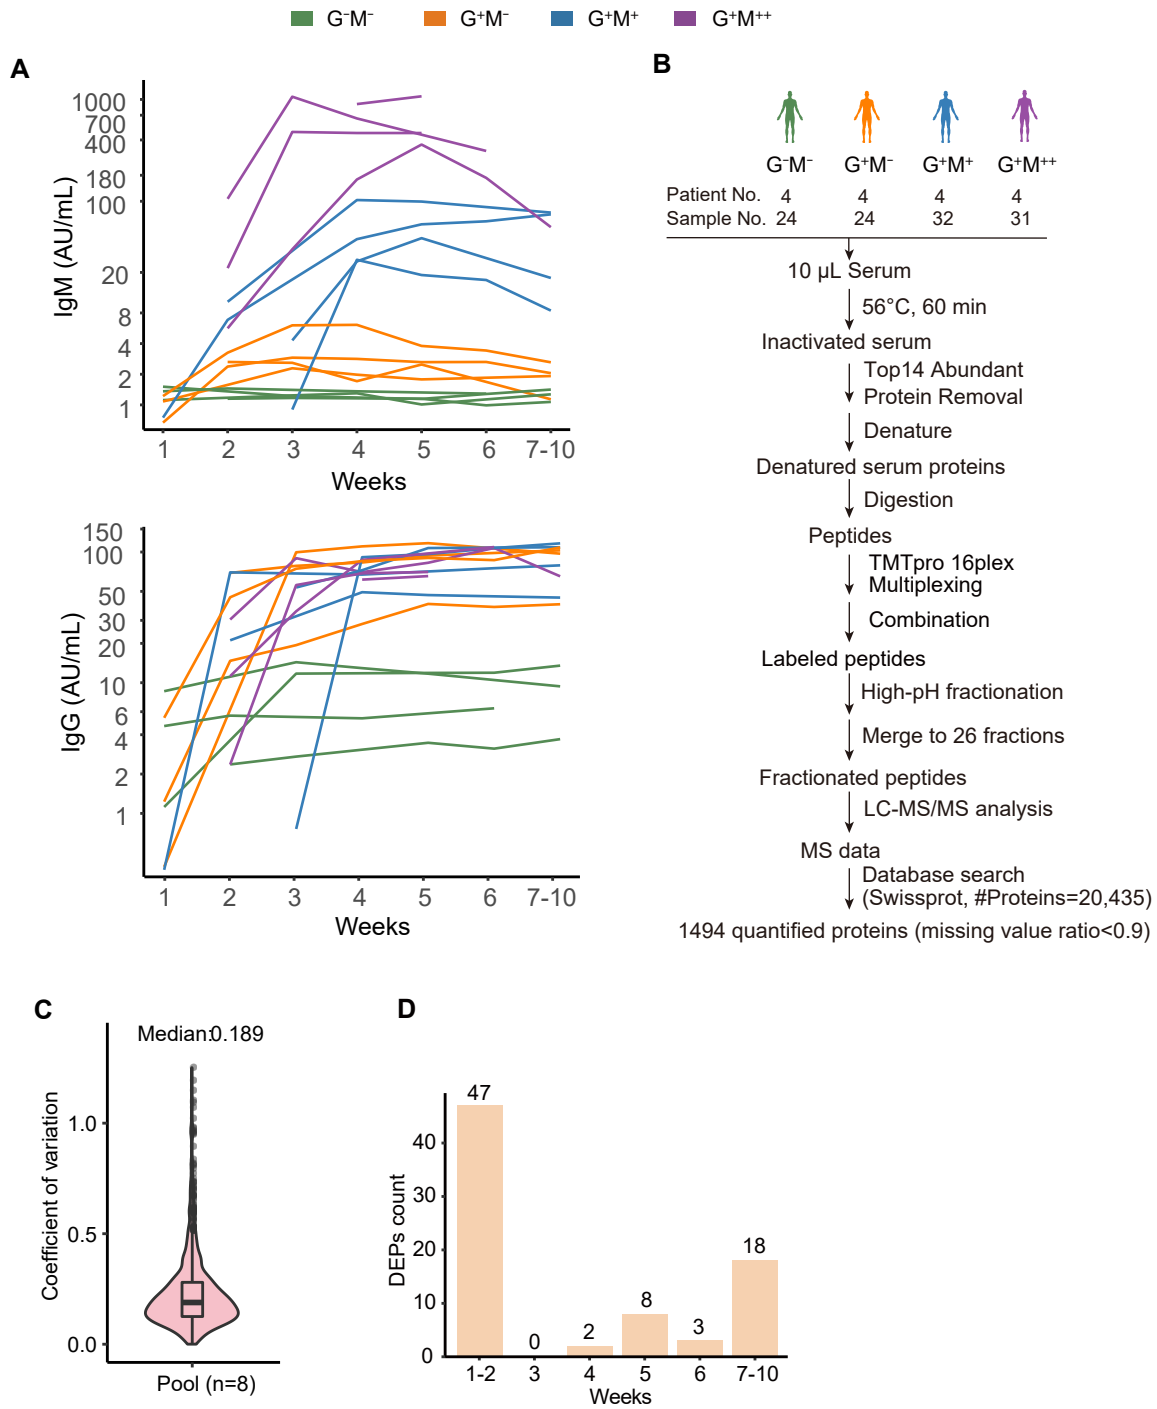

## **Supplementary materials provided as separate files**

**Table S1. Basic information of the patient cohort.**

**Table S2 The comparison of clinical information of the patients with four categories of serology.** Categorical variables were expressed as numbers (percentages). The comparison of categorical variables between the four groups was performed using chi-square. The comparison of continuous variables between the four groups was performed using the Kruskal-Wallis statistics.

**Table S3. Proteomic results of the patient cohort.**
